# Supplementary material
Source: publisher figshare collection journal article supplement (https://acs.figshare.com/ndownloader/files/5025202)
Supplement: Supplementary file 1 [file 5025202]

 
data_ww 
 
_audit_creation_method            SHELXL-97 
_chemical_name_systematic 
; 
 ? 
; 
_chemical_name_common             ? 
_chemical_melting_point           ? 
_chemical_formula_moiety          ? 
_chemical_formula_sum 
 'C53 H168 Cu20 N8 O70' 
_chemical_formula_weight          3308.75 
 
loop_ 
 _atom_type_symbol 
 _atom_type_description 
 _atom_type_scat_dispersion_real 
 _atom_type_scat_dispersion_imag 
 _atom_type_scat_source 
 'C'  'C'   0.0033   0.0016 
 'International Tables Vol C Tables 4.2.6.8 and 6.1.1.4' 
 'H'  'H'   0.0000   0.0000 
 'International Tables Vol C Tables 4.2.6.8 and 6.1.1.4' 
 'N'  'N'   0.0061   0.0033 
 'International Tables Vol C Tables 4.2.6.8 and 6.1.1.4' 
 'O'  'O'   0.0106   0.0060 
 'International Tables Vol C Tables 4.2.6.8 and 6.1.1.4' 
 'Cu'  'Cu'   0.3201   1.2651 
 'International Tables Vol C Tables 4.2.6.8 and 6.1.1.4' 
 
_symmetry_cell_setting            tetragonal
_symmetry_space_group_name_H-M    P42/n 
 
loop_ 
 _symmetry_equiv_pos_as_xyz 
 'x, y, z' 
 '-x+1/2, -y+1/2, z' 
 '-y, x+1/2, z+1/2' 
 'y+1/2, -x, z+1/2' 
 '-x, -y, -z' 
 'x-1/2, y-1/2, -z' 
 'y, -x-1/2, -z-1/2' 
 '-y-1/2, x, -z-1/2' 
 
_cell_length_a                    16.5194(9) 
_cell_length_b                    16.5194(9) 
_cell_length_c                    21.640(2) 
_cell_angle_alpha                 90.00 
_cell_angle_beta                  90.00 
_cell_angle_gamma                 90.00 
_cell_volume                      5905.4(8) 
_cell_formula_units_Z             2 
_cell_measurement_temperature     100(2) 
_cell_measurement_reflns_used     ? 
_cell_measurement_theta_min       ? 
_cell_measurement_theta_max       ? 
 
_exptl_crystal_description        block 
_exptl_crystal_colour             brown
_exptl_crystal_size_max           0.22 
_exptl_crystal_size_mid           0.21 
_exptl_crystal_size_min           0.20 
_exptl_crystal_density_meas       ? 
_exptl_crystal_density_diffrn     1.861 
_exptl_crystal_density_method     'not measured' 
_exptl_crystal_F_000              3364 
_exptl_absorpt_coefficient_mu     3.615 
_exptl_absorpt_correction_type    multi-scan
_exptl_absorpt_correction_T_min   0.5035 
_exptl_absorpt_correction_T_max   0.5317 
_exptl_absorpt_process_details    sadabs 
 
_exptl_special_details 
; 
 ? 
; 
 
_diffrn_ambient_temperature       100(2) 
_diffrn_radiation_wavelength      0.71073 
_diffrn_radiation_type            MoK\a 
_diffrn_radiation_source          'fine-focus sealed tube' 
_diffrn_radiation_monochromator   graphite 
_diffrn_measurement_device_type   bruker-CCD 
_diffrn_measurement_method        ? 
_diffrn_detector_area_resol_mean  ? 
_diffrn_standards_number          ? 
_diffrn_standards_interval_count  ? 
_diffrn_standards_interval_time   ? 
_diffrn_standards_decay_%         ? 
_diffrn_reflns_number             43313 
_diffrn_reflns_av_R_equivalents   0.0524 
_diffrn_reflns_av_sigmaI/netI     0.0365 
_diffrn_reflns_limit_h_min        -22 
_diffrn_reflns_limit_h_max        21 
_diffrn_reflns_limit_k_min        -22 
_diffrn_reflns_limit_k_max        13 
_diffrn_reflns_limit_l_min        -28 
_diffrn_reflns_limit_l_max        28 
_diffrn_reflns_theta_min          1.88 
_diffrn_reflns_theta_max          28.44 
_reflns_number_total              7419 
_reflns_number_gt                 5817 
_reflns_threshold_expression      >2sigma(I) 
 
_computing_data_collection        ? 
_computing_cell_refinement        ? 
_computing_data_reduction         ? 
_computing_structure_solution     'SHELXS-97 (Sheldrick, 1990)' 
_computing_structure_refinement   'SHELXL-97 (Sheldrick, 1997)' 
_computing_molecular_graphics     ? 
_computing_publication_material   ? 
 
_refine_special_details 
; 
 Refinement of F^2^ against ALL reflections.  The weighted R-factor wR and 
 goodness of fit S are based on F^2^, conventional R-factors R are based 
 on F, with F set to zero for negative F^2^. The threshold expression of 
 F^2^ > 2sigma(F^2^) is used only for calculating R-factors(gt) etc. and is 
 not relevant to the choice of reflections for refinement.  R-factors based 
 on F^2^ are statistically about twice as large as those based on F, and R- 
 factors based on ALL data will be even larger. 
; 
 
_refine_ls_structure_factor_coef  Fsqd  
_refine_ls_matrix_type            full 
_refine_ls_weighting_scheme       calc  
_refine_ls_weighting_details 
 'calc w=1/[\s^2^(Fo^2^)+(0.0224P)^2^+10.2126P] where P=(Fo^2^+2Fc^2^)/3' 
_atom_sites_solution_primary      direct 
_atom_sites_solution_secondary    difmap 
_atom_sites_solution_hydrogens    geom 
_refine_ls_hydrogen_treatment     mixed 
_refine_ls_extinction_method      none 
_refine_ls_extinction_coef        ? 
_refine_ls_number_reflns          7419 
_refine_ls_number_parameters      426 
_refine_ls_number_restraints      236 
_refine_ls_R_factor_all           0.0497 
_refine_ls_R_factor_gt            0.0320 
_refine_ls_wR_factor_ref          0.0787 
_refine_ls_wR_factor_gt           0.0706 
_refine_ls_goodness_of_fit_ref    1.056 
_refine_ls_restrained_S_all       1.074 
_refine_ls_shift/su_max           0.008 
_refine_ls_shift/su_mean          0.000 
 
loop_ 
 _atom_site_label 
 _atom_site_type_symbol 
 _atom_site_fract_x 
 _atom_site_fract_y 
 _atom_site_fract_z 
 _atom_site_U_iso_or_equiv 
 _atom_site_adp_type 
 _atom_site_occupancy 
 _atom_site_symmetry_multiplicity 
 _atom_site_calc_flag 
 _atom_site_refinement_flags 
 _atom_site_disorder_assembly 
 _atom_site_disorder_group 
Cu1 Cu 0.38232(2) 0.20797(2) 0.142168(16) 0.01646(8) Uani 1 1 d . . . 
Cu2 Cu 0.38423(2) 0.20958(2) 0.357678(15) 0.01502(8) Uani 1 1 d . C . 
Cu3 Cu 0.37869(2) 0.03678(2) 0.376591(16) 0.01903(9) Uani 1 1 d . C . 
Cu4 Cu 0.339851(19) 0.06577(2) 0.243804(14) 0.01308(8) Uani 1 1 d . . . 
Cu5 Cu 0.36887(2) 0.03672(2) 0.103537(15) 0.01602(8) Uani 1 1 d . C . 
O1W O 0.30702(11) 0.14117(12) 0.09291(8) 0.0146(4) Uani 1 1 d D C . 
O1 O 0.31915(13) -0.00595(13) 0.02883(9) 0.0225(4) Uani 1 1 d . . . 
O2W O 0.27159(11) 0.02659(12) 0.17696(9) 0.0149(4) Uani 1 1 d D C . 
H2WC H 0.2405(16) -0.0120(14) 0.1882(14) 0.018 Uiso 1 1 d D . . 
O2 O 0.41901(16) 0.05187(19) -0.02303(12) 0.0464(7) Uani 1 1 d . . . 
O3W O 0.40995(12) 0.10057(12) 0.17513(8) 0.0162(4) Uani 1 1 d D C . 
H3WC H 0.4589(12) 0.099(2) 0.1813(15) 0.019 Uiso 1 1 d D . . 
O3 O 0.5685(5) 0.1198(14) 0.1786(4) 0.032(3) Uani 0.43(3) 1 d PDU A 1 
O3A O 0.5590(4) 0.1504(9) 0.2669(6) 0.030(2) Uani 0.57(3) 1 d PDU A 2 
O4W O 0.40784(11) 0.11216(11) 0.30991(8) 0.0142(4) Uani 1 1 d D C . 
H4WC H 0.4567(8) 0.1145(19) 0.2977(14) 0.017 Uiso 1 1 d D . . 
O4 O 0.5649(6) 0.1208(12) 0.2815(4) 0.027(2) Uani 0.43(3) 1 d PDU A 1 
O4A O 0.5713(4) 0.0824(11) 0.1797(4) 0.032(2) Uani 0.57(3) 1 d PDU A 2 
O5W O 0.31005(12) 0.13553(12) 0.40091(9) 0.0177(4) Uani 1 1 d D . . 
H5WC H 0.304(2) 0.1522(19) 0.4374(10) 0.021 Uiso 1 1 d D . . 
O5 O 0.43296(14) -0.04931(14) 0.25744(10) 0.0289(5) Uani 1 1 d . . . 
O6W O 0.46267(12) 0.26637(12) 0.18953(10) 0.0205(4) Uani 1 1 d D C . 
H6WC H 0.4969(17) 0.2332(17) 0.2016(15) 0.025 Uiso 1 1 d D . . 
O6 O 0.46813(15) -0.03603(13) 0.35673(10) 0.0290(5) Uani 1 1 d . . . 
O7 O 0.3059(3) 0.2125(3) 0.51725(16) 0.0466(14) Uani 0.810(13) 1 d PDU B 1 
H7WC H 0.3578 0.2362 0.5295 0.056 Uiso 0.405(7) 1 d PR B 1 
O7A O 0.2589(18) 0.1885(9) 0.5099(7) 0.059(7) Uani 0.190(13) 1 d PDU B 2 
H7AB H 0.2137 0.1518 0.5187 0.071 Uiso 0.095(7) 1 d PR B 2 
O7W O 0.2792(2) 0.1906(2) 0.21867(17) 0.0434(8) Uani 0.75 1 d PU C 1 
O7WA O 0.2500 0.2500 0.1920(4) 0.0434(8) Uani 0.50 2 d SPU C 2 
O8W O 0.50537(18) 0.15524(17) 0.05871(12) 0.0421(7) Uani 1 1 d D . . 
H8WB H 0.483(2) 0.1192(19) 0.0371(16) 0.050 Uiso 1 1 d D . . 
H8WA H 0.533(2) 0.127(2) 0.0845(16) 0.050 Uiso 1 1 d D . . 
O9W O 0.48461(17) 0.15240(17) 0.44286(13) 0.0382(6) Uani 1 1 d D . . 
H9WA H 0.502(2) 0.1992(15) 0.4508(18) 0.048(13) Uiso 1 1 d D . . 
H9WB H 0.465(3) 0.136(3) 0.4759(15) 0.074(18) Uiso 1 1 d D . . 
O10W O 0.3963(4) -0.0667(4) 0.6010(3) 0.0605(17) Uiso 0.50 1 d PD . . 
H10D H 0.4037 -0.0601 0.6447 0.091 Uiso 0.50 1 d PRD . . 
H10F H 0.428(5) -0.108(4) 0.600(2) 0.091 Uiso 0.50 1 d PD . . 
O11W O 0.4084(2) 0.0806(2) 0.54448(14) 0.0591(9) Uani 1 1 d D . . 
H11E H 0.3647(19) 0.108(3) 0.548(3) 0.071 Uiso 1 1 d D . . 
H11F H 0.421(3) 0.057(3) 0.5784(13) 0.071 Uiso 1 1 d D . . 
N1 N 0.44511(16) -0.05376(16) 0.11815(12) 0.0218(5) Uani 1 1 d D . . 
N2 N 0.33724(19) -0.02890(16) 0.44538(13) 0.0278(6) Uani 1 1 d D . . 
H2WB H 0.355(2) -0.013(2) 0.4805(9) 0.033 Uiso 1 1 d D . . 
H2WA H 0.2864(8) -0.019(2) 0.4446(17) 0.033 Uiso 1 1 d D . . 
C1 C 0.35291(19) 0.0166(2) -0.02125(14) 0.0272(7) Uani 1 1 d U C . 
C2 C 0.3068(2) -0.0003(3) -0.07972(16) 0.0421(9) Uani 1 1 d U . . 
H2A H 0.3379 0.0193 -0.1153 0.063 Uiso 1 1 calc R C . 
H2B H 0.2545 0.0277 -0.0783 0.063 Uiso 1 1 calc R . . 
H2C H 0.2978 -0.0587 -0.0837 0.063 Uiso 1 1 calc R . . 
C3 C 0.4888(2) -0.1969(2) 0.11470(19) 0.0408(9) Uani 1 1 d U . . 
H3A H 0.4722 -0.2518 0.1030 0.061 Uiso 1 1 calc R C . 
H3B H 0.5007 -0.1955 0.1591 0.061 Uiso 1 1 calc R . . 
H3C H 0.5373 -0.1817 0.0914 0.061 Uiso 1 1 calc R . . 
C4 C 0.3422(2) -0.1602(2) 0.13291(16) 0.0323(7) Uani 1 1 d U . . 
H4A H 0.3000 -0.1211 0.1219 0.048 Uiso 1 1 calc R C . 
H4B H 0.3508 -0.1594 0.1777 0.048 Uiso 1 1 calc R . . 
H4C H 0.3254 -0.2146 0.1201 0.048 Uiso 1 1 calc R . . 
C5 C 0.4207(2) -0.13783(19) 0.10027(14) 0.0259(7) Uani 1 1 d U C . 
H5A H 0.4107 -0.1388 0.0547 0.031 Uiso 1 1 calc R . . 
C6 C 0.2500 0.2500 0.2500 0.0086(8) Uani 1 4 d SU . . 
C7 C 0.60086(18) 0.1144(2) 0.22900(14) 0.0251(6) Uani 1 1 d DU . . 
C8 C 0.6912(2) 0.1071(3) 0.23628(19) 0.0517(11) Uani 1 1 d U A . 
H8A H 0.7035 0.0789 0.2750 0.077 Uiso 1 1 calc R . . 
H8B H 0.7154 0.1612 0.2370 0.077 Uiso 1 1 calc R . . 
H8C H 0.7134 0.0763 0.2015 0.077 Uiso 1 1 calc R . . 
C9 C 0.4796(2) -0.06033(19) 0.30122(14) 0.0253(7) Uani 1 1 d U C . 
C10 C 0.5568(3) -0.1071(3) 0.29066(18) 0.0480(11) Uani 1 1 d U . . 
H10A H 0.5604 -0.1230 0.2471 0.072 Uiso 1 1 calc R C . 
H10B H 0.5568 -0.1557 0.3167 0.072 Uiso 1 1 calc R . . 
H10C H 0.6034 -0.0731 0.3014 0.072 Uiso 1 1 calc R . . 
C11 C 0.3477(3) -0.1184(2) 0.44233(18) 0.0410(9) Uani 1 1 d U C . 
H11A H 0.4070 -0.1302 0.4392 0.049 Uiso 1 1 calc R . . 
C12 C 0.3157(3) -0.1582(3) 0.5010(2) 0.0623(13) Uani 1 1 d U . . 
H12A H 0.3406 -0.1327 0.5372 0.093 Uiso 1 1 calc R C . 
H12B H 0.3291 -0.2160 0.5005 0.093 Uiso 1 1 calc R . . 
H12C H 0.2568 -0.1516 0.5030 0.093 Uiso 1 1 calc R . . 
C13 C 0.3070(3) -0.1506(2) 0.3850(2) 0.0496(10) Uani 1 1 d U . . 
H13A H 0.3296 -0.1238 0.3485 0.074 Uiso 1 1 calc R C . 
H13B H 0.2487 -0.1399 0.3873 0.074 Uiso 1 1 calc R . . 
H13C H 0.3161 -0.2091 0.3820 0.074 Uiso 1 1 calc R . . 
C14 C 0.2500 0.2500 0.5428(2) 0.0359(11) Uani 1 2 d SDU . . 
C15 C 0.2500 0.2500 0.6122(3) 0.0560(16) Uani 1 2 d SU B . 
H15A H 0.2051 0.2834 0.6273 0.084 Uiso 0.50 1 calc PR . . 
H15B H 0.3013 0.2722 0.6273 0.084 Uiso 0.50 1 calc PR . . 
H15C H 0.2436 0.1944 0.6273 0.084 Uiso 0.50 1 calc PR . . 
H1WB H 0.4878(18) -0.038(3) 0.0986(19) 0.067 Uiso 1 1 d D . . 
H1WA H 0.455(3) -0.051(3) 0.1571(7) 0.067 Uiso 1 1 d D . . 
H1WC H 0.294(3) 0.157(3) 0.0580(10) 0.067 Uiso 1 1 d D . . 
 
loop_ 
 _atom_site_aniso_label 
 _atom_site_aniso_U_11 
 _atom_site_aniso_U_22 
 _atom_site_aniso_U_33 
 _atom_site_aniso_U_23 
 _atom_site_aniso_U_13 
 _atom_site_aniso_U_12 
Cu1 0.01291(17) 0.01656(17) 0.01991(17) -0.00587(13) -0.00204(13) -0.00140(13) 
Cu2 0.01657(17) 0.01104(16) 0.01747(16) -0.00267(12) 0.00252(13) -0.00090(13) 
Cu3 0.0284(2) 0.01327(17) 0.01540(16) 0.00116(13) 0.00483(14) 0.00251(15) 
Cu4 0.01312(15) 0.01327(15) 0.01286(14) -0.00067(12) -0.00081(12) -0.00007(12) 
Cu5 0.01415(17) 0.01915(18) 0.01477(15) -0.00631(13) 0.00024(12) 0.00086(14) 
O1W 0.0123(9) 0.0176(10) 0.0139(9) -0.0017(7) 0.0000(7) -0.0019(7) 
O1 0.0220(11) 0.0274(11) 0.0181(10) -0.0072(8) -0.0029(8) -0.0010(9) 
O2W 0.0139(9) 0.0138(9) 0.0169(9) -0.0011(7) -0.0009(7) -0.0011(7) 
O2 0.0300(14) 0.077(2) 0.0318(13) -0.0189(13) 0.0066(11) -0.0208(14) 
O3W 0.0118(9) 0.0214(10) 0.0153(9) -0.0035(8) 0.0001(7) -0.0021(8) 
O3 0.016(3) 0.047(7) 0.033(3) 0.015(4) -0.004(2) 0.009(4) 
O3A 0.018(2) 0.028(4) 0.044(4) -0.017(3) 0.000(2) 0.006(2) 
O4W 0.0138(9) 0.0134(9) 0.0154(9) -0.0016(7) 0.0014(7) -0.0008(8) 
O4 0.017(3) 0.032(6) 0.031(3) -0.002(3) 0.000(3) 0.008(3) 
O4A 0.018(2) 0.048(6) 0.031(3) -0.005(3) -0.0053(18) 0.010(3) 
O5W 0.0183(10) 0.0148(10) 0.0199(9) -0.0034(8) 0.0050(8) -0.0017(8) 
O5 0.0328(13) 0.0262(12) 0.0277(11) -0.0082(9) 0.0019(10) 0.0053(10) 
O6W 0.0158(10) 0.0165(10) 0.0294(11) -0.0073(8) -0.0064(8) 0.0034(8) 
O6 0.0483(15) 0.0198(11) 0.0190(10) 0.0006(8) 0.0088(10) 0.0110(10) 
O7 0.044(3) 0.067(3) 0.0290(17) -0.0133(16) 0.0035(16) 0.000(2) 
O7A 0.064(11) 0.071(10) 0.043(8) -0.013(7) 0.005(7) 0.010(8) 
O7W 0.0433(10) 0.0437(10) 0.0431(10) -0.0014(7) 0.0003(7) -0.0002(7) 
O7WA 0.0433(10) 0.0437(10) 0.0431(10) -0.0014(7) 0.0003(7) -0.0002(7) 
O8W 0.0503(18) 0.0479(17) 0.0281(13) -0.0085(12) 0.0009(12) -0.0139(14) 
O9W 0.0357(15) 0.0390(16) 0.0399(15) -0.0030(12) -0.0136(12) -0.0016(12) 
O11W 0.099(3) 0.0467(19) 0.0316(14) 0.0017(13) -0.0124(17) -0.0079(18) 
N1 0.0204(13) 0.0232(13) 0.0218(12) -0.0071(11) 0.0022(10) 0.0025(11) 
N2 0.0413(17) 0.0172(13) 0.0250(13) 0.0028(11) 0.0107(13) 0.0045(12) 
C1 0.0195(15) 0.0400(19) 0.0221(14) -0.0148(13) 0.0027(12) 0.0003(13) 
C2 0.0333(19) 0.070(3) 0.0225(16) -0.0129(17) -0.0022(14) -0.0101(18) 
C3 0.042(2) 0.0299(18) 0.050(2) -0.0079(16) -0.0023(17) 0.0109(16) 
C4 0.0365(19) 0.0264(17) 0.0338(17) -0.0049(14) 0.0030(14) -0.0039(14) 
C5 0.0337(17) 0.0199(15) 0.0242(14) -0.0075(12) 0.0000(13) 0.0029(13) 
C6 0.0086(8) 0.0086(8) 0.0087(11) 0.000 0.000 0.000 
C7 0.0149(14) 0.0304(16) 0.0299(15) 0.0020(13) -0.0003(12) 0.0025(12) 
C8 0.0211(17) 0.096(3) 0.038(2) -0.011(2) -0.0066(15) 0.009(2) 
C9 0.0350(17) 0.0180(14) 0.0230(14) 0.0011(11) 0.0065(13) 0.0064(13) 
C10 0.055(2) 0.056(2) 0.0337(19) -0.0060(17) -0.0011(17) 0.031(2) 
C11 0.054(2) 0.0182(16) 0.050(2) 0.0087(15) 0.0300(18) 0.0058(15) 
C12 0.075(3) 0.033(2) 0.078(3) 0.031(2) 0.047(2) 0.016(2) 
C13 0.058(2) 0.0220(17) 0.069(2) -0.0102(17) 0.026(2) -0.0093(17) 
C14 0.039(3) 0.045(3) 0.024(2) 0.000 0.000 -0.009(2) 
C15 0.065(4) 0.074(4) 0.029(3) 0.000 0.000 0.019(3) 
 
_geom_special_details 
; 
 All esds (except the esd in the dihedral angle between two l.s. planes) 
 are estimated using the full covariance matrix.  The cell esds are taken 
 into account individually in the estimation of esds in distances, angles 
 and torsion angles; correlations between esds in cell parameters are only 
 used when they are defined by crystal symmetry.  An approximate (isotropic) 
 treatment of cell esds is used for estimating esds involving l.s. planes. 
; 
 
loop_ 
 _geom_bond_atom_site_label_1 
 _geom_bond_atom_site_label_2 
 _geom_bond_distance 
 _geom_bond_site_symmetry_2 
 _geom_bond_publ_flag 
Cu1 O6W 1.935(2) . ? 
Cu1 O5W 1.949(2) 8_656 ? 
Cu1 O3W 1.966(2) . ? 
Cu1 O1W 1.9752(19) . ? 
Cu1 O7W 2.393(4) . ? 
Cu1 Cu5 2.9582(5) . ? 
Cu2 O2W 1.9447(19) 8_656 ? 
Cu2 O4W 1.9521(19) . ? 
Cu2 O5W 1.968(2) . ? 
Cu2 O1W 1.9775(19) 8_656 ? 
Cu2 O7W 2.363(4) 8_656 ? 
Cu2 Cu3 2.8852(5) . ? 
Cu2 Cu5 3.0551(5) 8_656 ? 
Cu3 O6 1.953(2) . ? 
Cu3 N2 1.965(3) . ? 
Cu3 O4W 1.9659(19) . ? 
Cu3 O5W 2.055(2) . ? 
Cu3 O6W 2.343(2) 7_566 ? 
Cu3 Cu4 2.9830(5) . ? 
Cu4 O6W 1.943(2) 7_566 ? 
Cu4 O2W 1.9449(19) . ? 
Cu4 O3W 1.9698(19) . ? 
Cu4 O4W 1.9736(19) . ? 
Cu4 O7W 2.356(4) . ? 
Cu5 O1 1.945(2) . ? 
Cu5 N1 1.980(3) . ? 
Cu5 O3W 1.9933(19) . ? 
Cu5 O1W 2.018(2) . ? 
Cu5 O2W 2.2659(19) . ? 
Cu5 Cu2 3.0551(5) 7_566 ? 
O1W Cu2 1.9775(19) 7_566 ? 
O1 C1 1.274(4) . ? 
O2W Cu2 1.9447(19) 7_566 ? 
O2 C1 1.238(4) . ? 
O3 C7 1.218(7) . ? 
O3A C7 1.226(6) . ? 
O4 C7 1.287(7) . ? 
O4A C7 1.287(6) . ? 
O5W Cu1 1.949(2) 7_566 ? 
O5 C9 1.235(4) . ? 
O6W Cu4 1.943(2) 8_656 ? 
O6W Cu3 2.343(2) 8_656 ? 
O6 C9 1.281(4) . ? 
O7 C14 1.242(4) . ? 
O7A C14 1.250(9) . ? 
O7W C6 1.287(4) . ? 
O7W Cu2 2.363(4) 7_566 ? 
O7WA C6 1.254(8) . ? 
N1 C5 1.497(4) . ? 
N2 C11 1.489(4) . ? 
C1 C2 1.503(4) . ? 
C3 C5 1.522(5) . ? 
C4 C5 1.522(5) . ? 
C6 O7WA 1.254(8) 7_566 ? 
C6 O7W 1.287(4) 8_656 ? 
C6 O7W 1.287(4) 7_566 ? 
C6 O7W 1.287(4) 2 ? 
C7 C8 1.505(5) . ? 
C9 C10 1.509(5) . ? 
C11 C13 1.509(6) . ? 
C11 C12 1.525(5) . ? 
C14 O7 1.242(4) 2 ? 
C14 O7A 1.250(9) 2 ? 
C14 C15 1.502(7) . ? 
 
loop_ 
 _geom_angle_atom_site_label_1 
 _geom_angle_atom_site_label_2 
 _geom_angle_atom_site_label_3 
 _geom_angle 
 _geom_angle_site_symmetry_1 
 _geom_angle_site_symmetry_3 
 _geom_angle_publ_flag 
O6W Cu1 O5W 85.74(9) . 8_656 ? 
O6W Cu1 O3W 95.66(8) . . ? 
O5W Cu1 O3W 171.64(8) 8_656 . ? 
O6W Cu1 O1W 175.25(8) . . ? 
O5W Cu1 O1W 97.47(8) 8_656 . ? 
O3W Cu1 O1W 80.67(8) . . ? 
O6W Cu1 O7W 100.46(11) . . ? 
O5W Cu1 O7W 109.08(11) 8_656 . ? 
O3W Cu1 O7W 78.81(11) . . ? 
O1W Cu1 O7W 81.84(10) . . ? 
O6W Cu1 Cu5 132.70(6) . . ? 
O5W Cu1 Cu5 132.90(6) 8_656 . ? 
O3W Cu1 Cu5 42.01(5) . . ? 
O1W Cu1 Cu5 42.77(6) . . ? 
O7W Cu1 Cu5 91.57(9) . . ? 
O2W Cu2 O4W 94.52(8) 8_656 . ? 
O2W Cu2 O5W 169.22(8) 8_656 . ? 
O4W Cu2 O5W 82.17(8) . . ? 
O2W Cu2 O1W 86.58(8) 8_656 8_656 ? 
O4W Cu2 O1W 178.87(8) . 8_656 ? 
O5W Cu2 O1W 96.71(8) . 8_656 ? 
O2W Cu2 O7W 82.55(11) 8_656 8_656 ? 
O4W Cu2 O7W 97.80(10) . 8_656 ? 
O5W Cu2 O7W 108.02(11) . 8_656 ? 
O1W Cu2 O7W 82.58(10) 8_656 8_656 ? 
O2W Cu2 Cu3 126.86(6) 8_656 . ? 
O4W Cu2 Cu3 42.76(6) . . ? 
O5W Cu2 Cu3 45.40(6) . . ? 
O1W Cu2 Cu3 136.21(6) 8_656 . ? 
O7W Cu2 Cu3 124.36(9) 8_656 . ? 
O2W Cu2 Cu5 47.80(6) 8_656 8_656 ? 
O4W Cu2 Cu5 140.37(6) . 8_656 ? 
O5W Cu2 Cu5 132.14(6) . 8_656 ? 
O1W Cu2 Cu5 40.63(6) 8_656 8_656 ? 
O7W Cu2 Cu5 89.79(9) 8_656 8_656 ? 
Cu3 Cu2 Cu5 145.764(16) . 8_656 ? 
O6 Cu3 N2 95.18(10) . . ? 
O6 Cu3 O4W 92.48(8) . . ? 
N2 Cu3 O4W 172.33(10) . . ? 
O6 Cu3 O5W 164.27(9) . . ? 
N2 Cu3 O5W 92.98(10) . . ? 
O4W Cu3 O5W 79.65(8) . . ? 
O6 Cu3 O6W 117.85(8) . 7_566 ? 
N2 Cu3 O6W 100.88(11) . 7_566 ? 
O4W Cu3 O6W 75.12(8) . 7_566 ? 
O5W Cu3 O6W 73.52(8) . 7_566 ? 
O6 Cu3 Cu2 123.65(7) . . ? 
N2 Cu3 Cu2 131.66(8) . . ? 
O4W Cu3 Cu2 42.39(5) . . ? 
O5W Cu3 Cu2 42.99(5) . . ? 
O6W Cu3 Cu2 86.25(5) 7_566 . ? 
O6 Cu3 Cu4 92.84(6) . . ? 
N2 Cu3 Cu4 138.02(10) . . ? 
O4W Cu3 Cu4 40.88(5) . . ? 
O5W Cu3 Cu4 90.03(6) . . ? 
O6W Cu3 Cu4 40.61(5) 7_566 . ? 
Cu2 Cu3 Cu4 73.222(12) . . ? 
O6W Cu4 O2W 96.30(9) 7_566 . ? 
O6W Cu4 O3W 176.37(9) 7_566 . ? 
O2W Cu4 O3W 82.92(8) . . ? 
O6W Cu4 O4W 84.90(8) 7_566 . ? 
O2W Cu4 O4W 176.58(8) . . ? 
O3W Cu4 O4W 95.68(8) . . ? 
O6W Cu4 O7W 96.74(11) 7_566 . ? 
O2W Cu4 O7W 82.71(11) . . ? 
O3W Cu4 O7W 79.65(11) . . ? 
O4W Cu4 O7W 93.98(11) . . ? 
O6W Cu4 Cu3 51.71(6) 7_566 . ? 
O2W Cu4 Cu3 141.97(6) . . ? 
O3W Cu4 Cu3 130.33(6) . . ? 
O4W Cu4 Cu3 40.69(5) . . ? 
O7W Cu4 Cu3 117.02(9) . . ? 
O1 Cu5 N1 97.34(10) . . ? 
O1 Cu5 O3W 168.90(9) . . ? 
N1 Cu5 O3W 93.37(9) . . ? 
O1 Cu5 O1W 90.08(8) . . ? 
N1 Cu5 O1W 170.24(9) . . ? 
O3W Cu5 O1W 78.96(8) . . ? 
O1 Cu5 O2W 104.87(8) . . ? 
N1 Cu5 O2W 106.46(9) . . ? 
O3W Cu5 O2W 74.66(7) . . ? 
O1W Cu5 O2W 77.53(7) . . ? 
O1 Cu5 Cu1 127.81(7) . . ? 
N1 Cu5 Cu1 128.97(8) . . ? 
O3W Cu5 Cu1 41.30(6) . . ? 
O1W Cu5 Cu1 41.65(5) . . ? 
O2W Cu5 Cu1 85.74(5) . . ? 
O1 Cu5 Cu2 91.12(6) . 7_566 ? 
N1 Cu5 Cu2 145.76(8) . 7_566 ? 
O3W Cu5 Cu2 81.58(6) . 7_566 ? 
O1W Cu5 Cu2 39.64(5) . 7_566 ? 
O2W Cu5 Cu2 39.48(5) . 7_566 ? 
Cu1 Cu5 Cu2 65.059(11) . 7_566 ? 
Cu1 O1W Cu2 109.84(9) . 7_566 ? 
Cu1 O1W Cu5 95.58(8) . . ? 
Cu2 O1W Cu5 99.73(8) 7_566 . ? 
C1 O1 Cu5 114.59(19) . . ? 
Cu2 O2W Cu4 109.88(9) 7_566 . ? 
Cu2 O2W Cu5 92.72(8) 7_566 . ? 
Cu4 O2W Cu5 94.92(8) . . ? 
Cu1 O3W Cu4 113.62(10) . . ? 
Cu1 O3W Cu5 96.69(8) . . ? 
Cu4 O3W Cu5 103.40(9) . . ? 
Cu2 O4W Cu3 94.85(8) . . ? 
Cu2 O4W Cu4 126.18(10) . . ? 
Cu3 O4W Cu4 98.44(8) . . ? 
Cu1 O5W Cu2 113.91(10) 7_566 . ? 
Cu1 O5W Cu3 103.58(9) 7_566 . ? 
Cu2 O5W Cu3 91.61(8) . . ? 
Cu1 O6W Cu4 122.62(11) . 8_656 ? 
Cu1 O6W Cu3 94.25(8) . 8_656 ? 
Cu4 O6W Cu3 87.69(8) 8_656 8_656 ? 
C9 O6 Cu3 120.8(2) . . ? 
C6 O7W Cu4 134.9(2) . . ? 
C6 O7W Cu2 125.8(2) . 7_566 ? 
Cu4 O7W Cu2 84.86(12) . 7_566 ? 
C6 O7W Cu1 122.7(2) . . ? 
Cu4 O7W Cu1 87.82(12) . . ? 
Cu2 O7W Cu1 85.72(12) 7_566 . ? 
C5 N1 Cu5 119.2(2) . . ? 
C11 N2 Cu3 118.3(2) . . ? 
O2 C1 O1 123.3(3) . . ? 
O2 C1 C2 120.5(3) . . ? 
O1 C1 C2 116.1(3) . . ? 
N1 C5 C4 109.6(2) . . ? 
N1 C5 C3 110.1(3) . . ? 
C4 C5 C3 112.2(3) . . ? 
O7WA C6 O7WA 180.000(1) 7_566 . ? 
O7WA C6 O7W 58.20(17) 7_566 8_656 ? 
O7WA C6 O7W 121.80(17) . 8_656 ? 
O7WA C6 O7W 58.20(17) 7_566 7_566 ? 
O7WA C6 O7W 121.80(17) . 7_566 ? 
O7W C6 O7W 116.4(3) 8_656 7_566 ? 
O7WA C6 O7W 121.80(17) 7_566 . ? 
O7WA C6 O7W 58.20(17) . . ? 
O7W C6 O7W 106.12(15) 8_656 . ? 
O7W C6 O7W 106.12(15) 7_566 . ? 
O7WA C6 O7W 121.80(17) 7_566 2 ? 
O7WA C6 O7W 58.20(17) . 2 ? 
O7W C6 O7W 106.12(15) 8_656 2 ? 
O7W C6 O7W 106.12(15) 7_566 2 ? 
O7W C6 O7W 116.4(3) . 2 ? 
O3 C7 O3A 108.3(6) . . ? 
O3 C7 O4A 28.5(4) . . ? 
O3A C7 O4A 122.6(5) . . ? 
O3 C7 O4 125.6(6) . . ? 
O3A C7 O4 27.0(3) . . ? 
O4A C7 O4 126.3(6) . . ? 
O3 C7 C8 122.4(6) . . ? 
O3A C7 C8 121.9(5) . . ? 
O4A C7 C8 115.4(4) . . ? 
O4 C7 C8 111.8(5) . . ? 
O5 C9 O6 125.5(3) . . ? 
O5 C9 C10 119.1(3) . . ? 
O6 C9 C10 115.3(3) . . ? 
N2 C11 C13 109.6(3) . . ? 
N2 C11 C12 110.5(3) . . ? 
C13 C11 C12 112.2(4) . . ? 
O7 C14 O7 127.0(5) . 2 ? 
O7 C14 O7A 41.6(12) . . ? 
O7 C14 O7A 103.8(11) 2 . ? 
O7 C14 O7A 103.8(11) . 2 ? 
O7 C14 O7A 41.6(12) 2 2 ? 
O7A C14 O7A 110.5(18) . 2 ? 
O7 C14 C15 116.5(3) . . ? 
O7 C14 C15 116.5(3) 2 . ? 
O7A C14 C15 124.8(9) . . ? 
O7A C14 C15 124.8(9) 2 . ? 
 
_diffrn_measured_fraction_theta_max    0.996 
_diffrn_reflns_theta_full              28.44 
_diffrn_measured_fraction_theta_full   0.996 
_refine_diff_density_max    0.661 
_refine_diff_density_min   -0.736 
_refine_diff_density_rms    0.095 
